## Case report

## Recurrent pulmonary cryptococcosis in a patient with idiopathic CD4 lymphocytopenia

ZHU YUANJIE\*, GU JULIN\*, CHE FUBING &amp; CHEN JIANGHAN

*Cryptococcus Lab, Department of Dermatology, Changzheng Hospital, Shanghai, China*

A case of recurrent cryptococcosis with idiopathic CD4 lymphocytopenia is reported in this article. After an initial cryptococcal infection in the lung, the patient experienced one episode of cryptococcal meningitis and two more episodes of cryptococcal pneumonia within a period of 12 years. Genetic studies revealed that all isolated microbes were identical, indicating that all subsequent episodes were recurrence instead of re-infection.

**Keywords** *Cryptococcus neoformans*, cryptococcosis, idiopathic CD4 lymphocytopenia

### Introduction

Cryptococcosis combined with idiopathic CD4 lymphocytopenia (ICL) is an uncommon infectious disease with rare recurrence. The central nervous system (CNS) is the primary site of infection [1]. To our knowledge, there has been no report of >2 relapses, or cryptococcal pneumonia in the relapse.

Here we report a case of cryptococcosis with three relapses within 12 years, among which two episodes were cryptococcal pneumonia. Genetic analysis of isolated pathogens by minisatellite core sequence-PCR (M13-PCR) [2] and IGS1 sequencing [3] demonstrated that all four isolates were identical.

### Case report

A 41-year-old female was admitted to the Changzheng hospital after a routine health examination revealed patchy consolidation in the left lung using chest X-ray in 1988. The patient was free of symptoms at the time. The patient received treatment with wide-spectrum

antibiotics, but responded poorly. Pulmonary lobectomy of left lower lobe was performed on suspicion of lung cancer. A diagnosis of pulmonary cryptococcosis was established by histopathology and fungal culture. The cerebrospinal fluid (CSF) test was negative. The patient was discharged after one-month treatment with daily intravenous amphotericin B injection. Three months later, she was admitted again on complaint of headache and vomiting. A diagnosis of cryptococcal meningitis was made by mycological microscopy and CSF culture. The sputum test was negative. The patient recovered after 6-week treatment with amphotericin B plus 5-flucytosine. The patient did not receive maintenance therapy, and was free of any sign of cryptococcal infection for 12 years until 2000.

In March 2000, she was hospitalized for fever and cough. A diagnosis of cryptococcal pneumonia was made based on X-ray, computed tomography (CT), fungal microscopy and sputum culture. Magnetic resonance imaging results were normal. Encapsulated budding yeast-like cells were not found in the CSF. The patient was treated with amphotericin B plus 5-flucytosine for 6 weeks. The last three sputum cultures were negative prior to the discharge.

In October 2000 (6 months from the last episode), the patient was admitted again for coughing. Mycological microscopy, sputum culture and endobronchial biopsy were positive for *C. neoformans* (Figs. 1 and 2). X-ray showed patchy consolidation in the right lower

Received 12 March 2008; Final revision received 6 May 2008; Accepted 7 June 2008

Correspondence: Chen Jianghan, Cryptococcus Lab, Department of Dermatology, Changzheng Hospital, Shanghai, China. Tel/Fax: +86 21 63610109, ext 73438. E-mail: chenjianghan@126.com

\*These 2 authors contributed equally to this work.

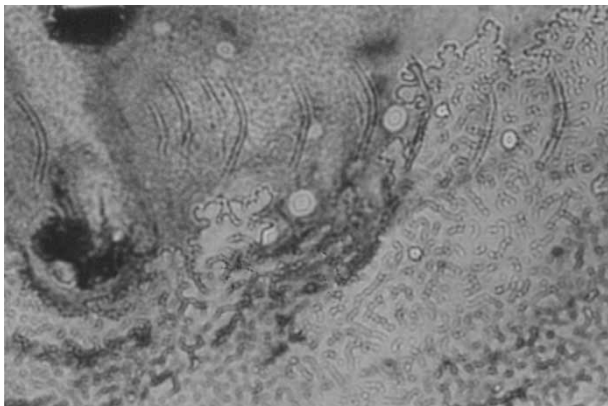

**Fig. 1** Encapsulated, yeast-like microbes in sputum under a microscope ( $\times 400$ ).

lobe (Fig. 3). Fungal culture and microscopic examination of the CSF and blood were negative. Cryptococcal antigen was positive in serum but negative in the CSF. After 12-week antifungal treatment, symptoms and signs dissipated (Fig. 4). The patient was discharged after a 2-week period during which three consecutive fungal culture and microscopic examination of sputum were negative. The patient was placed on maintenance treatment with oral fluconazole (150 mg per day). Table 1 show the clinical profile, lab results, and treatment of the four episodes.

White blood cell count was abnormally low at a range between  $2.61 \times 10^9/l$  and  $2.61 \times 10^9/l$  since the first episode of infection in 1988. Red blood cell count was also low, within a range between  $3.26 \times 10^9/l$  and  $3.26 \times 10^9/l$ . Platelet count was normal. Since March 2000, the CD4 lymphocyte count in this patient remained constant between 4.5% (81 cells/ml) and 5.1% (94 cells/ml). She was HIV-negative (confirmed repeatedly using ELISA, Western blot and PCR) and

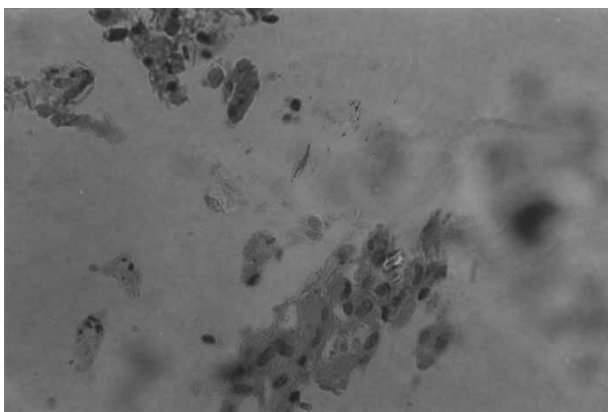

**Fig. 2** Encapsulated yeast-like microbes in the endobronchial biopsy sample stained with PAS ( $\times 400$ ).

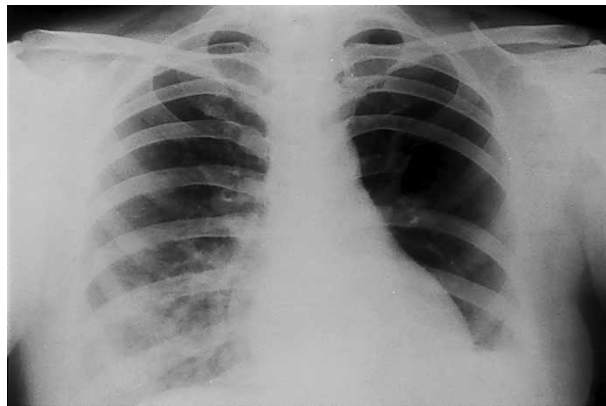

**Fig. 3** Chest X ray during the third episode (March 2000), showing patchy consolidation in the right side.

never received any immunosuppressive treatment. PPT test for tuberculosis was negative. No evidence of autoimmune disease or malignant tumor was found. Based on these findings, a diagnosis of recurrent pulmonary cryptococcosis with ICL was made.

The follow-up consisted of visits to our clinic every 6 months, routine lab works, and CD4 lymphocyte count. The last visit occurred in December 2007. The

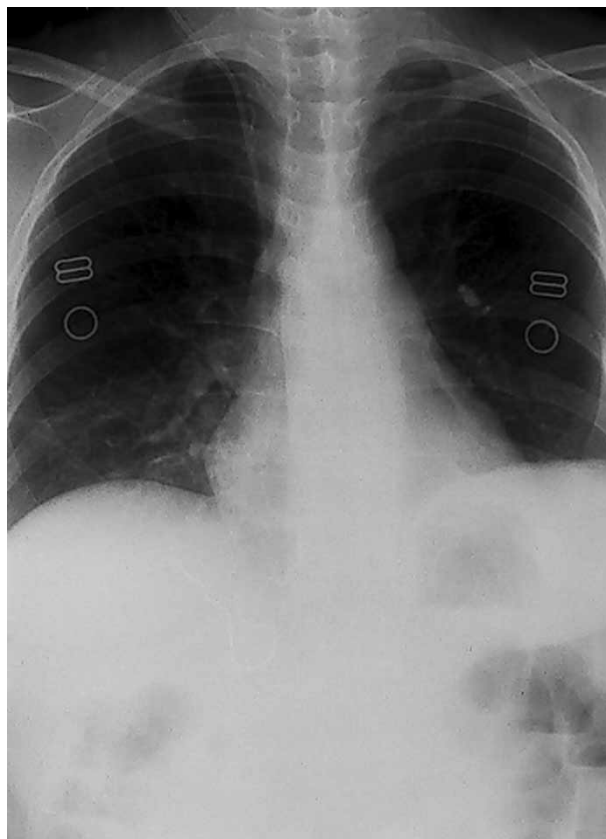

**Fig. 4** Chest X ray showed improvement after treatment.

**Table 1** Clinical profile, labs, and treatment of the reported case.

| Infection Time | Infection type | CSF findings                       | Sputum findings                           | Blood findings                                       | Treatment                                                                                                  |
|----------------|----------------|------------------------------------|-------------------------------------------|------------------------------------------------------|------------------------------------------------------------------------------------------------------------|
| April, 1988    | Pneumonia      | Culture: Negative<br>LAT: N.A.     | Microscopy: N.A.<br>Culture: Positive     | CD4 count: N.A.<br>Culture: Negative.<br>LAT: N.A.   | Lobectomy; amphotericin B 25 mg /day for 1 month                                                           |
| July, 1988     | Meningitis     | Culture: Positive<br>LAT: N.A.     | Microscopy: Negative<br>Culture: Negative | CD4 count: N.A.<br>Culture: Negative.<br>LAT: N.A.   | amphotericin B 25 mg/day plus 5-flucytosine 3 g /day for 6 weeks                                           |
| March, 2000    | Pneumonia      | Culture: Negative<br>LAT: Negative | Microscopy: Positive<br>Culture: positive | CD4 count: 4.5%<br>Culture: Negative.<br>LAT: 1:1280 | amphotericin B 25 mg/day plus 5-flucytosine 3 g/day for 6 weeks                                            |
| October 2000   | Pneumonia      | Culture: Negative<br>LAT: Negative | Microscopy: Positive<br>Culture: positive | CD4 count: 5.1%<br>Culture: Negative.<br>LAT: 1:1280 | amphotericin B 25 mg/day plus 5-flucytosine 3 g/day for 12 weeks and floconazole 150 mg/day as maintenance |

CD4 lymphocyte count remained at a steady low level of 4–5% (72–96 cells/ml) throughout the follow-up. Additional HIV tests were all negative. No infection with uncommon microbes, such as herpes zoster virus and pneumocystis, was noted.

## Isolate analysis

### Phenotypic identification

Analysis of the pathogen phenotype included colony morphology in bird seed agar, urease activity, and ability of the fungi to grow in 37°C. Canavanine-glycine-bromothymol (CGB) blue agar was used to differentiate *C. neoformans* from *C. gattii*. The mating type was determined using a PCR method. Mating type **a** was amplified using an allele-specific primer of the STE12 gene [4]. Serotype (A and D) and mating type (**a** and  $\alpha$ ) were amplified with specific primers of the STE20 gene [5]. In a V-8 juice agar, each strain was crossed with B-3501A ( $\alpha$ ) and JEC20 (**a**). The serotype was determined by Crypto Check Kit (Iatron Laboratories Inc.; Tokyo, Japan). All four strains were *C. neoformans* var. *neoformans*, serotype A and mating-type  $\alpha$ .

### Genetic analysis

The reference strains for PCR fingerprinting were provided by Dr K. J. Kwon-Chung at the National Institutes of Health of the US, and included: WM 148 (serotype A, VNI), WM 626 (serotype A, VNII), WM 628 (serotype AD, VNIII), WM 629 (serotype D, VNIV), H99. High-molecular-weight DNA was isolated as described previously [5]. The minisatellite-specific core sequence of the wild-type phage M13 (5'GAGGGTGGCGGTTCT 3') [2] was used as single

primer in the PCR. Amplification was performed in a volume of 50  $\mu$ L containing 10 mM Tris-HCl (pH 8.3), 50 mM KCl, 1.5 mM MgCl<sub>2</sub>, 0.2 mM each of dATP, dCTP, dGTP and dTTP (Roche Diagnostics GmbH; Mannheim, Mannheim, Germany), 3 mM magnesium acetate, 30 ng primer, 2.5 U Amplitaq DNA polymerase (Applied Biosystems; Foster City, CA), and 25 ng high-molecular-weight genomic DNA. PCR was performed for 35 cycles in a Perkin-Elmer thermal cycler with 20 s of denaturation at 94°C, 1 min annealing at 50°C, and 20 s extension at 72°C, followed by a final extension cycle of 6 min at 72°C. Amplification products were concentrated to approximately 20  $\mu$ l and separated using 1.4% agarose gel in 1X Tris-borate-EDTA (TBE) buffer at 60 V, and visualized under UV light. The four isolates displayed identical pattern (Fig. 5).

### Multilocus sequence typing (MLST)

Multilocus sequence typing was performed using methods previously described for TEF1, SOD1, CAP10, PLB1 and IGS [3]. The PCR primers and amplification conditions are shown in Table 2. PCR products were purified using a QIAquick PCR purification kit (QIAGEN; Valencia, CA). Sequences were generated from DNA strands and manually edited. MLST analysis results indicated that all 4 isolates were identical.

## Discussion

In 1992, ICL was defined by the US Centers for Disease Control and Prevention (CDC) as a condition with depressed number of circulating CD4 lymphocytes (<300 cells/ml or <20% of total T cells) on at least two occasions separated by >6 weeks, with no

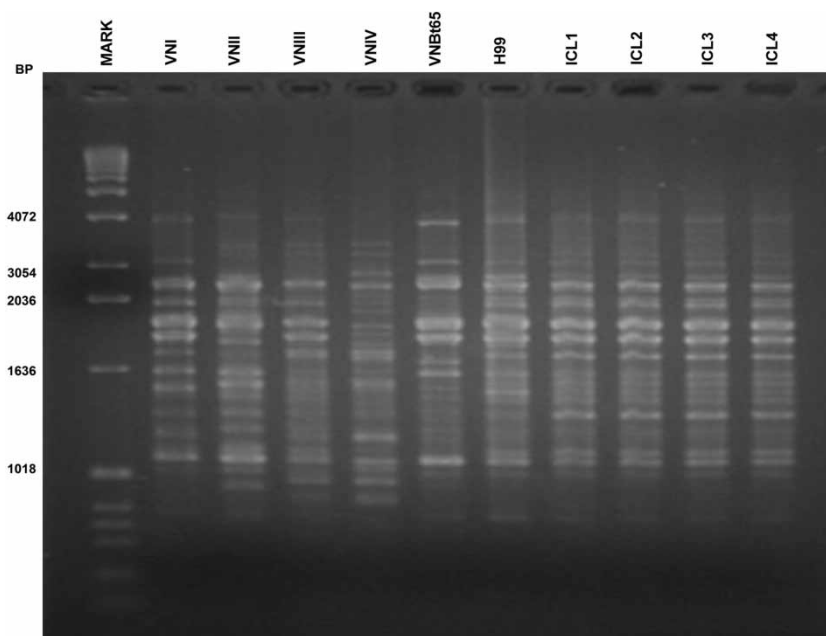

Fig. 5 PCR fingerprints of the four isolates.

identifiable causes such as HIV infection or immunosuppressive therapy [6]. This case clearly met all diagnostic criteria for ICL [7], i.e., low CD4 lymphocyte over a period of close to 20 years, no HIV infection, and no history of immunosuppressive therapy.

Methods commonly used to identify *C. neoformans* strain include electrophoretic karyotyping [10,11], PCR fingerprinting [12], random amplified polymorphic DNA (RAPD) analysis [13,14], multilocus enzyme typing [13], allelic variation of the URA5 locus [15,16], and DNA fingerprinting [17–21]. The methods used in the reported case (minisatellite core sequence PCR and MLST analysis, etc.) are generally more

sensitive. In particular, IGS gene is the most rapidly evolving region of rDNA families [22], and thus provided a reliable marker for identification. Results from these experiments demonstrated that the later episodes of infection were relapse in nature and not new infection. This finding is consistent with previous notion that cryptococcosis relapse is mostly due to persistence of the original infecting strain [19,23].

The CNS is the most common site for cryptococcal infection in ICL patients. In a comprehensive review, Zonios *et al.* [1] reported that 30 out of 42 cases of cryptococcosis in ICL patients were CNS infection. Among the 42 cases, 5 (12%) had relapse. In all five cases with relapse, the initial episode were CNS

Table 2 MLST primers.

| Locus   | Primer sequence               | Melting temperature (°C) | Product size (bp) | PCR conditions                                                              |
|---------|-------------------------------|--------------------------|-------------------|-----------------------------------------------------------------------------|
| CAP10-f | 5'-CCG GAA CTG ACC ACT TCA TC | 56.3                     | 668               | 12 cycles 62–56°C stepdown 2°C every 2 cycles followed by 20 cycles at 56°C |
| CAP10-r | 5'-GCC CAC TCA AGA CAC AAC CT | 58.5                     |                   |                                                                             |
| PLB1-f  | 5'-CTT CAG GCG GAG AGA GGT TT | 57.7                     | 674               | 30 cycles 56°C                                                              |
| PLB1-r  | 5'-GAT TTG GCG TTG GTT TCA GT | 55.2                     |                   |                                                                             |
| SOD1-f  | 5'-TCT AAT CGA AAT GGT CAA GG | 50.7                     | 680               |                                                                             |
| SOD1-r  | 5'-CGC AGC TGT TCG TCT GGA TA | 58.1                     |                   |                                                                             |
| TEF1-f  | 5'-AAT CGT CAA GGA GAC CAA CG | 55.9                     | 844               |                                                                             |
| TEF1-r  | 5'-CGT CAC CAG ACT TGA CGA AC | 56.5                     |                   |                                                                             |
| IGS1-f  | 5'-ATC CTT TGC AGA CGA CTT GA | 55.3                     | 790               |                                                                             |
| IGS1-r  | 5'-GTG ATC AGT GCA TTG CAT GA | 54.7                     |                   |                                                                             |

*PLB1*, Phospholipase; *TEF1*, Translation elongation factor 1 $\alpha$ ; *IGS1*, Ribosomal RNA intergenic spacer; *SOD1*, Cu, Zn superoxide dismutase; *CAP10*, Capsular associated protein.

infection. Also, more than two episodes of relapse have never been documented in any single case [1,8,9]. In our case, relapse occurred three times within a period of 12 years. Another interesting feature of this case is the fact that two out three relapses were cryptococcal pneumonia. A much longer follow-up (20 years vs. an average of 32 months in other reported cases) may have accounted for the unusual number of relapses in our case.

CD4 lymphocyte remained fairly constant at a low level of 4.5 ~ 5.1%, even during the period between the episodes. This is different from the partial recovery of CD4 lymphocyte when infection is under control in previous reports [1]. Since there was no medical history that suggested other risk factors for cryptococcosis in this case (such as cryptococcosis endemic), we believe decreased CD4 lymphocyte is the predisposing factor in this patient as it is for AIDS patients.

It is estimated that 3/4 patients with a defined diagnosis of cryptococcal infection receive long-term antifungal maintenance treatment. The relatively low rate of relapse after the initial episode in ICL patients argues against routine maintenance treatment [1]. Our case had three relapses during a period of 12 years without maintenance treatment. During a 7-year period with fluconazole maintenance treatment after 2000, the patient did not have a single episode of infection. Based on this observation, we believe that the best practice is to use antifungal maintenance therapy only after a relapse, and not after the initial episode of infection. For patients not receiving maintenance therapy, the CD4 lymphocyte count should be monitored regularly.

## Acknowledgements

Part of this work was supported by Chinese National Science Fund, No. 30600540 (to Y. Zhu).

**Declaration of interest:** The authors report no conflicts of interest. The authors alone are responsible for the content and writing of the paper.

## References

- Zonios DI, Falloon J, Huang CY, Chaitt D, Bennett JE. Cryptococcosis and idiopathic CD4 lymphocytopenia. *Medicine* 2007; **86**: 78–92.
- Meyer W, Castaneda A, Jackson S, Huynh M, Castaneda E. Molecular typing of IberoAmerican *Cryptococcus neoformans* isolates. *Emerg Infect Dis* 2003; **9**: 189–195.
- Litvintseva AP, Thakur R, Vilgalys R, Mitchell TG. Multilocus sequence typing reveals three genetic subpopulations of *Cryptococcus neoformans* var. *grubii* (serotype A), including a unique population in Botswana. *Genetics* 2006; **172**: 2223–2238.
- Okabayashi K, Kano R, Watanabe T, Hasegawa A. Serotypes and mating types of clinical isolates from feline cryptococcosis in Japan. *J Veter Med Sci* 2006; **68**: 91–94.
- Meyer W, Marszewska K, Amirmostofian M, et al. Molecular typing of global isolates of *Cryptococcus neoformans* var. *neoformans* by polymerase chain reaction fingerprinting and randomly amplified polymorphic DNA—a pilot study to standardize techniques on which to base a detailed epidemiological survey. *Electrophoresis* 1999; **20**: 1790–1799.
- Unexplained CD4+ T-lymphocyte depletion in persons without evident HIV infection – United States. *MMWR* 1992; **41**: 541–545.
- Ulrich A Walker, Klaus Warnatz. Idiopathic CD4 lymphocytopenia. *Curr Opin Rheumatol* 2006; **18**:389–395.
- Kawabata T, Matsuyama W, Higashimoto I, et al. Pleural cryptococcosis with idiopathic CD4 positive T-lymphocytopenia. *Intern Med* 2004; **43**: 977–981.
- Lepur D, Vranjican Z, Barsic B, Himbele J, Klinar I. Idiopathic Cd4+T-lymphocytopenia--two unusual patients with cryptococcal meningitis. *J Infect* 2005; **51**: E15–18.
- Perfect JR, Ketabchi N, Cox GM, Ingram CW, Beiser CL. Karyotyping of *Cryptococcus neoformans* as an epidemiological tool. *J Clin Microb* 1993; **31**: 3305–3309.
- Polacheck I, Lebens GA. Electrophoretic karyotype of the pathogenic yeast *Cryptococcus neoformans*. *J Gen Microb* 1989; **135**: 65–71.
- Meyer W, Mitchell TG, Freedman EZ, Vilgalys R. Hybridization probes for conventional DNA fingerprinting used as single primers in the polymerase chain reaction to distinguish strains of *Cryptococcus neoformans*. *J Clin Microb* 1993; **31**: 2274–2280.
- Brandt ME, Hutwagner LC, Kuykendall RJ, Pinner RW. Comparison of multilocus enzyme electrophoresis and random amplified polymorphic DNA analysis for molecular subtyping of *Cryptococcus neoformans*. The Cryptococcal Disease Active Surveillance Group. *J Clin Microb* 1995; **33**: 1890–1895.
- Haynes KA, Sullivan DJ, Coleman DC, et al. Involvement of multiple *Cryptococcus neoformans* strains in a single episode of cryptococcosis and reinfection with novel strains in recurrent infection demonstrated by random amplification of polymorphic DNA and DNA fingerprinting. *J Clin Microb* 1995; **33**: 99–102.
- Casadevall A, Freundlich LF, Marsh L, Scharff MD. Extensive allelic variation in *Cryptococcus neoformans*. *J Clin Microb* 1992; **30**: 1080–1084.
- Chen F, Currie BP, Chen LC, et al. Genetic relatedness of *Cryptococcus neoformans* clinical isolates grouped with the repetitive DNA probe CNRE-1. *J Clin Microb* 1995; **33**: 2818–2822.
- Magee JT, Philpot C, Yang J, Hosein IK. Pyrolysis typing of isolates from a recurrence of systemic cryptococcosis. *J Med Microb* 1994; **40**: 165–169.
- Spitzer ED, Spitzer SG. Use of a dispersed repetitive DNA element to distinguish clinical isolates of *Cryptococcus neoformans*. *J Clin Microb* 1992; **30**: 1094–1097.
- Spitzer ED, Spitzer SG, Freundlich LF, Casadevall A. Persistence of initial infection in recurrent *Cryptococcus neoformans* meningitis. *Lancet* 1993; **341**: 595–596.
- Varma A, Kwon-Chung KJ. DNA probe for strain typing of *Cryptococcus neoformans*. *J Clin Microb* 1992; **30**: 2960–2967.
- Varma A, Swinne D, Staib F, Bennett JE, Kwon-Chung KJ. Diversity of DNA fingerprints in *Cryptococcus neoformans*. *J Clin Microb* 1995; **33**: 1807–1814.

- 22 Diaz MR, Boekhout T, Kiesling T, Fell JW. Comparative analysis of the intergenic spacer regions and population structure of the species complex of the pathogenic yeast *Cryptococcus neoformans*. *FEMS Yeast Res* 2005; **5**: 1129–1140.
- 23 Sullivan D, Haynes K, Moran G, Shanley D, Coleman D. Persistence, replacement, and microevolution of *Cryptococcus neoformans* strains in recurrent meningitis in AIDS patients. *J Clin Microb* 1996; **34**: 1739–1744.
